# Supplementary material for: Seroprevalence and determinants of transfusion transmissible infections among voluntary blood donors in Homabay, Kisumu and Siaya counties in western Kenya
Source: PubMed Central journal article supplement (PMC5848540; doi:10.1186/s13104-018-3276-y), 2018-03-12
Supplement: 13104_2018_3276_MOESM2_ESM.pdf [file 13104_2018_3276_MOESM2_ESM.pdf]

# Appendix VII (a): Blood donor Questionnaire

KENYA NATIONAL BLOOD TRANSFUSION SERVICE

Donation Number

## DONOR QUESTIONNAIRE

Clinic Venue \_\_\_\_\_ County \_\_\_\_\_ Clinic Code: \_\_\_\_\_ Donor Number \_\_\_\_\_

### SECTION 1: DAILY BLOOD DONOR REGISTRATION & SCREENING FORM (Donors please complete this section below)

Surname: \_\_\_\_\_ Other Names: \_\_\_\_\_ GENDER: F / M

Student Number/ National ID Number: \_\_\_\_\_ Date of Birth: \_\_\_\_/\_\_\_\_/\_\_\_\_ (dd/mm/yy)

Marital Status: (Mark in appropriate box)  Single  Married  Divorced/Separated  Widowed

Contact Details: Postal Address (where you would like to receive your correspondence)

Code

Home phone number: \_\_\_\_\_ Cell phone number: \_\_\_\_\_

Email: \_\_\_\_\_ Residence (county) \_\_\_\_\_

Level of education: None/ Primary/ Secondary/ Tertiary Occupation: .....

When did you last donate Blood? ..... Blood Group: .....

### SECTION 2: HEALTH QUESTIONNAIRE

Circle the appropriate answer

|                                                             |        |
|-------------------------------------------------------------|--------|
| 1. Are you feeling well and in good health today?           | Yes/No |
| 2. Have you eaten in the last 6 hours?                      | Yes/No |
| 3. Have you ever fainted?                                   | Yes/No |
| <b>In the past 6 months have you:</b>                       |        |
| 4. Been ill, received any treatment or any medication?      | Yes/No |
| 5. Had any injections or vaccinations (immunizations)?      | Yes/No |
| 6. Female Donors: Have you been pregnant or breast feeding? | Yes/No |
| <b>In the past 12 months have you:</b>                      |        |
| 7. Received a blood transfusion or any blood products?      | Yes/No |
| <b>Do you have or have you ever had:</b>                    |        |
| 8. Any problems with your heart or lungs e.g. asthma?       | Yes/No |
| 9. A bleeding condition or a blood disease?                 | Yes/No |
| 10. Any type of cancer?                                     | Yes/No |
| 11. Diabetes, epilepsy or TB?                               | Yes/No |
| 12. Any other long term illness<br>Please Specify           | Yes/No |

## Appendix VII( b): Blood Donor Questionnaire

KENYA NATIONAL BLOOD TRANSFUSION SERVICE

### SECTION 3: RISK ASSESSMENT QUESTIONNAIRE

The lives of patients who receive your blood are totally dependent on your honesty & frankness in answering the questions below. Your answers will be treated in a confidential manner. Circle the appropriate answer.

|                                                                                     |        |
|-------------------------------------------------------------------------------------|--------|
| <b>In the past 12 months have you:</b>                                              |        |
| 1. Received or given money, goods or favours in exchange for sexual activities?     | Yes/No |
| 2. Had sexual activity with a person whose background you do not know?              | Yes/No |
| 3. Been raped or sodomized?                                                         | Yes/No |
| 4. Had a stab wound or had an accidental needle stick injury e.g. injection needle? | Yes/No |
| 5. Had any tattooing or body piercing e.g. ear piercing?                            | Yes/No |
| 6. Had a sexually transmitted disease (STD)?                                        | Yes/No |
| 7. Live with or had sexual contact with someone with yellow eyes or yellow skin?    | Yes/No |
| 8. Had sexual activity with anyone besides your regular sex partner?                | Yes/No |
| <b>Have you ever:</b>                                                               |        |
| 9. Had yellow eyes or yellow skin?                                                  | Yes/No |
| 10. Injected yourself or been injected, besides in a health facility?               | Yes/No |
| 11. Used non-medical drugs such as Marijuana, Cocaine etc?                          | Yes/No |
| 12. Have you or your partner been tested for HIV?                                   | Yes/No |
| 13. Do you consider your blood safe to transfuse to a patient?                      | Yes/No |

### SECTION 4: DECLARATION (Please read this before you complete the form with your name and signature below)

I declare that I have answered all the questions truthfully and accurately.

I understand that my blood will be tested for HIV, Hepatitis B & C, and Syphilis and the results of my tests may be obtained from the National Blood Transfusion Service.

I understand that should any of the screening tests give a reactive result, I will be contacted by use any communication medium(s) to send me **important information**. Such medium(s) shall include but not limited to e-mail, post office, mobile telephone and/or fixed telephone, and offered counseling to make an informed decision about further confirmatory testing and management.

I hereby give consent to KNBTS to use the contact details provided in this form to communicate to me as the need may be.

I understand the blood may be used for scientific research, main objective being to improve the safety of the blood supply to patients.

I consent to give blood; I understand that it may be used for transfusion for the benefit of others.

Signature: \_\_\_\_\_ Date: \_\_\_\_\_

#### For Official Use:

|             |              |    |       |                          |
|-------------|--------------|----|-------|--------------------------|
| Weight (kg) | Hb >12.5g/dl | BP | Pulse | <b>Donor is Accepted</b> |
|             |              |    |       | Yes      No              |

#### Report:

Name of Nurse / Counselor: \_\_\_\_\_ Date: \_\_\_\_\_

|            |                  |          |              |                      |
|------------|------------------|----------|--------------|----------------------|
| Low Volume | > 1 Venepuncture | Hematoma | <b>Faint</b> |                      |
|            |                  |          | Mild         | Moderate      Severe |

|                |                 |  |
|----------------|-----------------|--|
| Time Needle In | Time Needle Out |  |
|----------------|-----------------|--|

|                                |      |
|--------------------------------|------|
| Report:<br>Name of Phelotomist | Date |
|--------------------------------|------|
